# Supplementary material
Source: PubMed Central journal article supplement (PMC2889564)

Fig. S3

A

| substitution type | no. of mixed sites | no. of different switched sites |
|-------------------|--------------------|---------------------------------|
| A → G, T → C      | 237                | 31                              |
| G → A, C → T      | 54                 | 35                              |
| A → T, T → A      | 19                 | 7                               |
| G → C, C → G      | 4                  | 4                               |
| C → A, G → T      | 8                  | 6                               |
| A → C, T → G      | 7                  | 0                               |
| total             | 329                | 83                              |

B

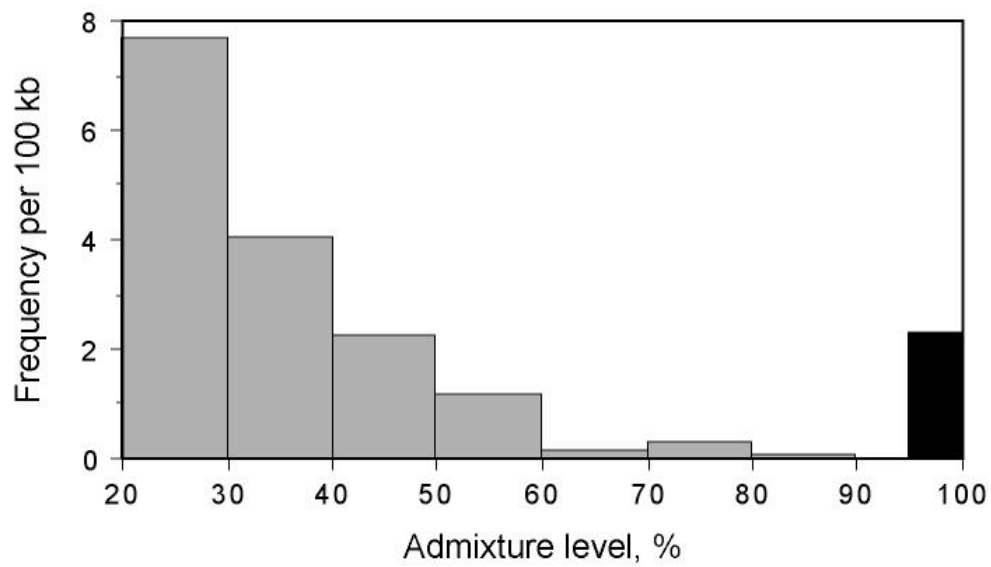

Supplement: 1003634107_sfig03.pdf [file 1003634107_sfig03.pdf]
